# Supplementary material for: Role of plant MicroRNA in cross-species regulatory networks of humans
Source: PubMed Central journal article supplement (PMC4977847; doi:10.1186/s12918-016-0292-1), 2016-08-08
Supplement: 12918_2016_292_MOESM1_ESM.pdf [file 12918_2016_292_MOESM1_ESM.pdf]

# Role of Plant MicroRNA in Cross-species Regulatory Networks of Humans

Hao Zhang<sup>1,2</sup>, Yanpu Li<sup>1</sup>, Yuaning Liu<sup>1,2</sup>, Haiming Liu<sup>1</sup>, Hongyu Wang<sup>1</sup>, Wen Jin<sup>1</sup>, Yanmei

Zhang<sup>1</sup>, Chao Zhang<sup>3</sup>, and Dong Xu<sup>1,2,\*</sup>

## Supplementary Information, Data S1

### Input of network construction

After the target validation process, we set a threshold of 50 genes, meaning that for each miRNA, we only select top 50 targets. For all the 25 miRNAs, we derived 531 targets after removing the duplication.

|            |          |           |         |          |          |
|------------|----------|-----------|---------|----------|----------|
| A4GALT     | CDC42EP2 | GPC1      | MEST    | S100A2   | VPS33B   |
| AATF       | CDC45    | GPNMB     | MFI2    | S100A9   | VPS53    |
| ABCB9      | CDK20    | GPR115    | MFSD7   | SAMD14   | WDR11    |
| ABI3       | CDT1     | GPR52     | MIDN    | SAP30BP  | WDR49    |
| SPPL2B     | CECR5    | GPRC5B    | MMP25   | SASH3    | WDR83    |
| AC007952.1 | CEND1    | GPRIN1    | MORC2   | SCNN1G   | WFDC10B  |
| ACP2       | CHRM1    | GPT       | MRPL24  | SCUBE1   | WFDC2    |
| ACSF2      | CINP     | GRASP     | MRPS2   | SDF4     | WIP1     |
| ACTN4      | CLDN7    | GRIPAP1   | MSI1    | SDHAF2   | WNT10A   |
| ADAM18     | CLEC11A  | GRN       | MTFP1   | SEMA4C   | WWOX     |
| ADRA2C     | CLPTM1   | GSDMC     | MXD3    | SEMA4G   | XDH      |
| AKAP10     | CLPTM1L  | GTF3C5    | MXRA8   | SEMA6B   | XPO6     |
| AKR7A2     | CNTN1    | GUCY2F    | MYO1A   | SEPX1    | XRCC3    |
| AKT1       | COQ4     | GYS1      | MYOC    | SERPINA3 | ZBTB20   |
| ALKBH4     | CPN2     | H1FX      | MZF1    | SERPINB8 | ZC3H18   |
| ALPPL2     | CPZ      | HES6      | NAT6    | SERPING1 | ZDHHC1   |
| AMIGO3     | CREB3    | HGF       | NDEL1   | SETD6    | ZDHHC11B |
| ANKRD34A   | CREG1    | HIST1H2BO | NDUFAF1 | SF1      | ZFP62    |
| AP1B1      | CRIP1    | HIST2H3A  | NEFM    | SF3B5    | ZG16     |
| AP1M2      | CRTC2    | HIST2H3C  | NEU4    | SH2D3C   | ZMYND11  |
| AP3S1      | CSDC2    | HLA-DMA   | NF2     | SIDT2    | ZNF221   |
| ARFGAP1    | CSF2RB   | HMHA1     | NGFRAP1 | SIRT3    | ZNF259   |
| ARHGAP6    | CST9L    | HOMER3    | NKAIN4  | SIRT6    | ZNF362   |
| ARHGDIG    | CTSZ     | HOXB1     | NR0B2   | SIX2     | ZNF497   |
| ARHGEF5    | CTXN1    | HOXB5     | NR5A1   | SIX6     | ZNF584   |
| ARMCX6     | CXorf48  | HOXD4     | NT5M    | SKP1     | ZNF595   |
| ARSD       | CYP2A7   | HOXD9     | NUDT18  | SLC25A10 | ZNF628   |
| ASCL2      | D2HGDH   | HSF2BP    | NUDT2   | SLC25A22 | ZNF645   |
| ASH2L      | DBH      | HSPA12B   | OLFM2   | SLC25A29 | ZNF771   |

|           |          |           |          |            |        |
|-----------|----------|-----------|----------|------------|--------|
| ASPRV1    | DBNDD2   | HSPB2     | OLIG2    | SLC26A1    | ZNF789 |
| ATAD3A    | DBNL     | HSPB8     | OR2AG1   | SLC29A2    | ZNRF4  |
| ATOX1     | DDT      | HTR3E     | OXER1    | SLC29A4    |        |
| ATP10A    | DDX31    | HTR4      | P2RX4    | SLC2A4RG   |        |
| ATP13A1   | DDX47    | IDH3G     | P2RY11   | SLC2A5     |        |
| ATP13A2   | DDX54    | IFT74     | PACSIN3  | SLC32A1    |        |
| ATP4A     | DEDD     | IGFBP7    | PAICS    | SLC38A10   |        |
| ATP5D     | DENND1A  | IGSF22    | PAK4     | SLC4A11    |        |
| ATP5SL    | DFNA5    | IL18RAP   | PAQR6    | SLCO5A1    |        |
| ATP6V0A4  | DIAPH1   | IL20RB    | PAQR7    | SMG6       |        |
| ATPAF2    | DISC1    | ILVBL     | PBX4     | SMTNL2     |        |
| ATPIF1    | DMPK     | INF2      | PDE1C    | SNAI1      |        |
| AXIN1     | DNAI2    | INSC      | PDZD7    | SNAP47     |        |
| B2M       | DNAJB13  | INSM2     | PEA15    | SND1       |        |
| B3GALT6   | DNMT1    | IRF5      | PEAR1    | SNRPB      |        |
| B4GALNT4  | DOLPP1   | IRX1      | PEMT     | SOX14      |        |
| BARX1     | DTNA     | ISL2      | PHYHD1   | SPATA2L    |        |
| BBS1      | DUSP13   | ISOC2     | PID1     | SPON2      |        |
| BCL7B     | DUSP7    | ITM2C     | PIN1     | SPTBN4     |        |
| BCS1L     | E4F1     | JAKMIP2   | PITX3    | SPTLC1     |        |
| BEST4     | EEF1A2   | KAT5      | PKP3     | SRM        |        |
| BLK       | EFNA3    | KCNJ4     | PLA2G4C  | SRRM3      |        |
| BRCC3     | EFNB1    | KCNK12    | PLAT     | SRRM5      |        |
| BUB3      | EIF2C2   | KCNN2     | PLIN1    | ST6GALNAC5 |        |
| C10orf10  | ENO1     | KIAA0100  | PLK1     | STK25      |        |
| C11orf21  | EPHA8    | KIAA0913  | POU4F3   | STK32C     |        |
| C11orf49  | ERICH1   | KIF26A    | PPP1R9B  | STOX2      |        |
| C11orf73  | ERN1     | KIF2B     | PPP2R5D  | SURF6      |        |
| C12orf74  | ERN2     | KIFAP3    | PPYR1    | SUSD1      |        |
| C15orf24  | ESPNL    | KIR2DL1   | PQLC1    | SYNGR1     |        |
| C15orf44  | ESRRA    | KIR2DL5B  | PRAMEF10 | SYTL1      |        |
| C17orf105 | ETV3     | KIRREL3   | PRDM2    | TAB1       |        |
| C17orf48  | EXOC6    | KLF15     | PRELID2  | TBC1D10B   |        |
| C17orf62  | EXT2     | KLK3      | PRKAR1B  | TCAP       |        |
| C17orf70  | FADS6    | KNG1      | PRKCD    | TCF21      |        |
| C19orf22  | FAH      | KRT34     | PRPH     | TCTN2      |        |
| C19orf25  | FAHD2A   | KRTAP13-1 | PRPS1    | TDRKH      |        |
| C19orf43  | FAHD2B   | KRTAP9-3  | PRR18    | TECPR1     |        |
| C1orf109  | FAM103A1 | KRTAP9-4  | PRSS21   | TGM7       |        |
| C1QL2     | FAM109B  | KRTAP9-8  | PRSS35   | TMCO5A     |        |
| C20orf132 | FAM123A  | LAMP1     | PRTFDC1  | TMED1      |        |
| C20orf20  | FAM204A  | LBP       | PTP4A3   | TMEM114    |        |
| C20orf24  | FAM205A  | LBX2      | PTPN5    | TMEM129    |        |
| C2CD2L    | FAM206A  | LCE1B     | PUSL1    | TMEM159    |        |

|          |         |           |         |          |
|----------|---------|-----------|---------|----------|
| C3orf18  | FAM22A  | LCE1C     | PXK     | TMEM175  |
| C3orf20  | FAM22F  | LCN1      | PYY     | TMEM180  |
| C4orf44  | FAM40A  | LCP1      | QRICH1  | TMEM203  |
| C6orf108 | FBXL19  | LECT2     | RAB37   | TMEM79   |
| C6orf201 | FBXO25  | LGALS7    | RABEP2  | TMPRSS3  |
| C6orf26  | FDXR    | LGALS7B   | RABGAP1 | TNFRSF17 |
| C6orf47  | FGFR4   | LGI4      | RAMP1   | TP73     |
| C7orf10  | FOLR2   | LIMS2     | RANGAP1 | TPI1     |
| C7orf34  | FOXM1   | LINC00482 | RARG    | TRADD    |
| C7orf68  | FTH1    | LPAR3     | RBM19   | TRAF2    |
| C9orf24  | FZR1    | LRRC41    | RBP7    | TRAPPC2L |
| CABIN1   | GABRE   | LRRC49    | RCC1    | TRIM11   |
| CACNA1G  | GALNS   | LRRC6     | RETN    | TRIM28   |
| CACNG7   | GATA6   | LY6D      | REXO4   | TRIM54   |
| CAMK2N2  | GBAS    | MAFF      | RGS10   | TRMU     |
| CAPN10   | GCAT    | MAGIX     | RHBDD3  | TRO      |
| CAPN3    | GDF15   | MAP3K11   | RHOF    | TST      |
| CAPZB    | GGA1    | MAPK13    | RNF135  | TUBB3    |
| CARS     | GIPR    | MAPK4     | ROGDI   | TYMS     |
| CCDC107  | GJB1    | MAPK8IP2  | ROR1    | U2AF2    |
| CCDC64B  | GJB3    | MAPRE3    | RP1L1   | UBL4B    |
| CCDC77   | GJB4    | MARCKSL1  | RPL13   | ULK4     |
| CCDC88C  | GLT1D1  | MATN4     | RPS6KA4 | UMODL1   |
| CCM2     | GLTPD1  | MBD2      | RPS9    | UNC5B    |
| CCNE1    | GMPR    | MBD3      | RPUSD1  | UPK3B    |
| CCS      | GNLY    | MC5R      | RSPO1   | UTP18    |
| CCT7     | GORASP1 | MCAT      | RTN4RL1 | VENTX    |

## Supplementary Information, Data S2

### Verified tissue-specific gene selection

We collected the validated specific genes of eight tissues from TiSGed<sup>23</sup>. For this collection, we set certain domains of the parameters (SPM and DPM) as designed by TiSGed.

| Gene Level | SPM   | DPM   |
|------------|-------|-------|
| Ubiquitous | > 0.2 | > 0.2 |
| High       | < 0.7 | < 0.7 |
| Specific   | < 0.9 | < 0.9 |

SPM and DPM both ranged from 0 to 1. SPM is a parameter indicating tissue-specific genes when it is close to 1, whereas DPM is especially for ubiquitous genes when approaching 0. By using both SPM and DPM values, we gain confidence in filtering out the genes at each level.

### Figure Legends

### **Supplementary Information, Figure S1**

Figure S1. Node weight assignment. (a) Node weight distribution of all 531 nodes. (b) Weight changes during iterations. The change was reduced to within 0.003 after 15 iterations.

### **Supplementary Information, Figure S2**

Figure S2. Comparison between plant and human target distributions after the filtering process. (a) Original Arabidopsis targets. (b) Arabidopsis targets after screening. (c) Original Human targets. (d) Human targets after screening. There is a remarkable reduction of the noisy points between (a) and (b), and between (c) and (d), which strongly supports the effectiveness of our method and parameters, and provides a valid guide that can help explore the mechanism of cross-species miRNA targets.

### **Supplementary Information**

**Supplementary Information File 1** contains the input of network construction, verified tissue-specific gene selection, node weight assignment and comparison between plant and human target distributions after the filtering process.

**Supplementary Information File 2 and File 3** are the technical details and p-values to describe the enrichment of GO terms for Arabidopsis and human, respectively.

**Supplementary Information File 4** is the result of grouping generic GO categories for human and Arabidopsis individually by CateGORizer.
