# Supplementary material for: Role of plant MicroRNA in cross-species regulatory networks of humans
Source: PubMed Central journal article supplement (PMC4977847; doi:10.1186/s12918-016-0292-1), 2016-08-08

A)

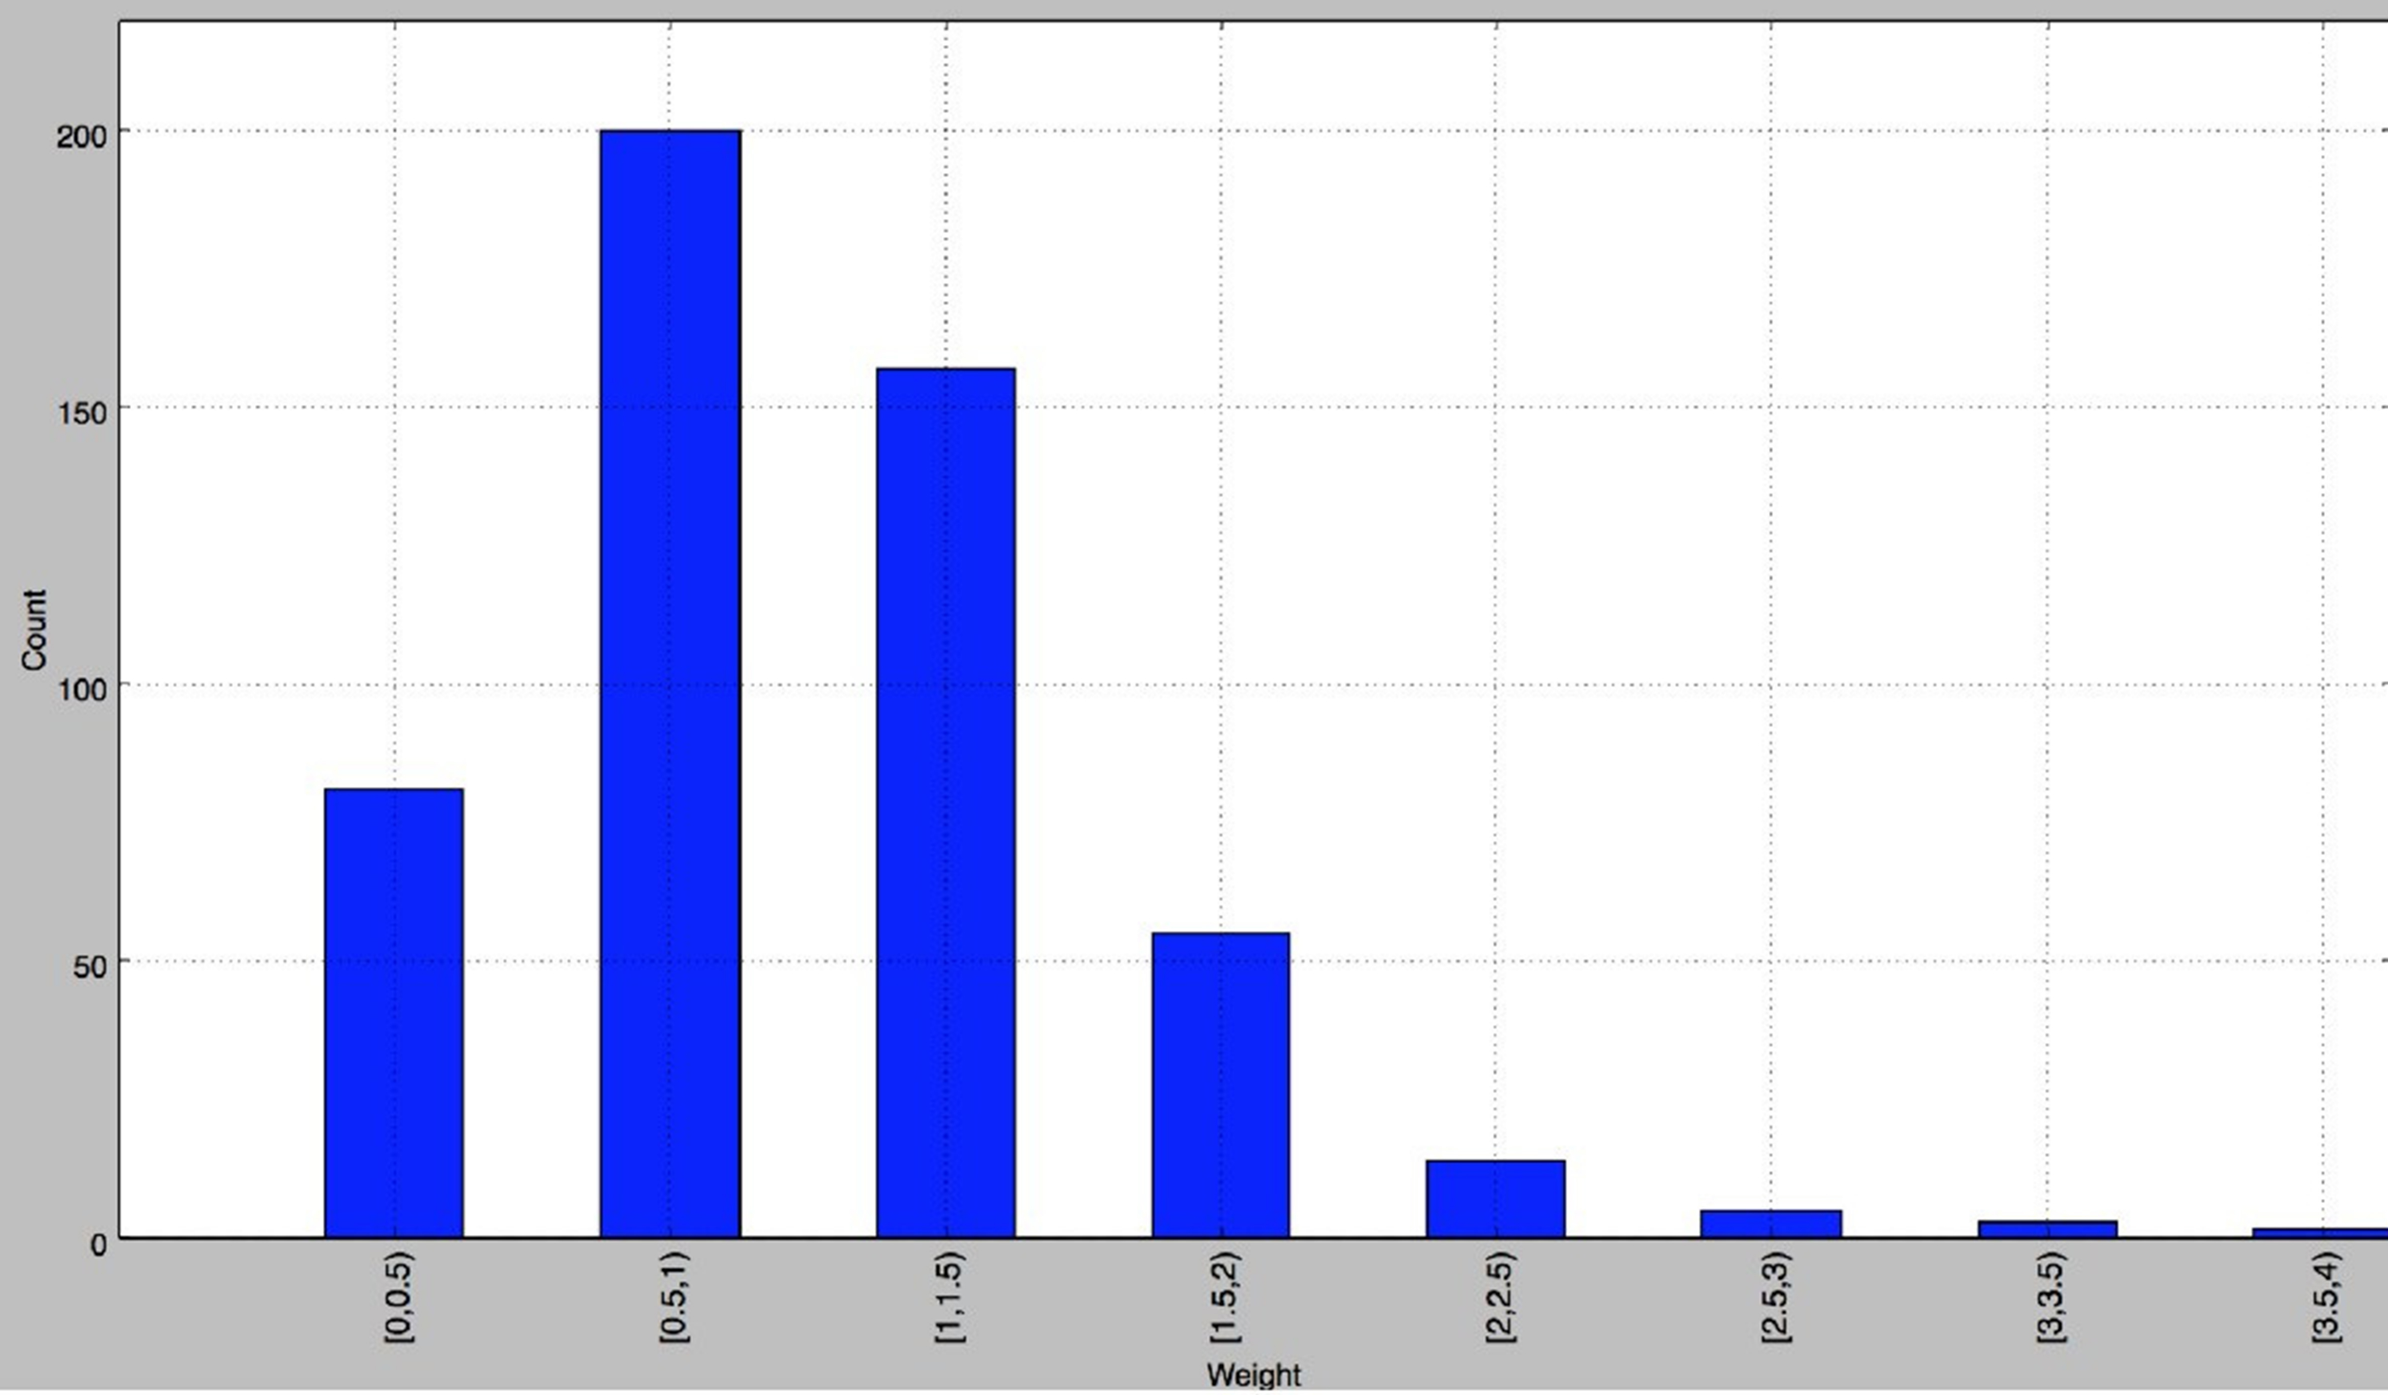

B)

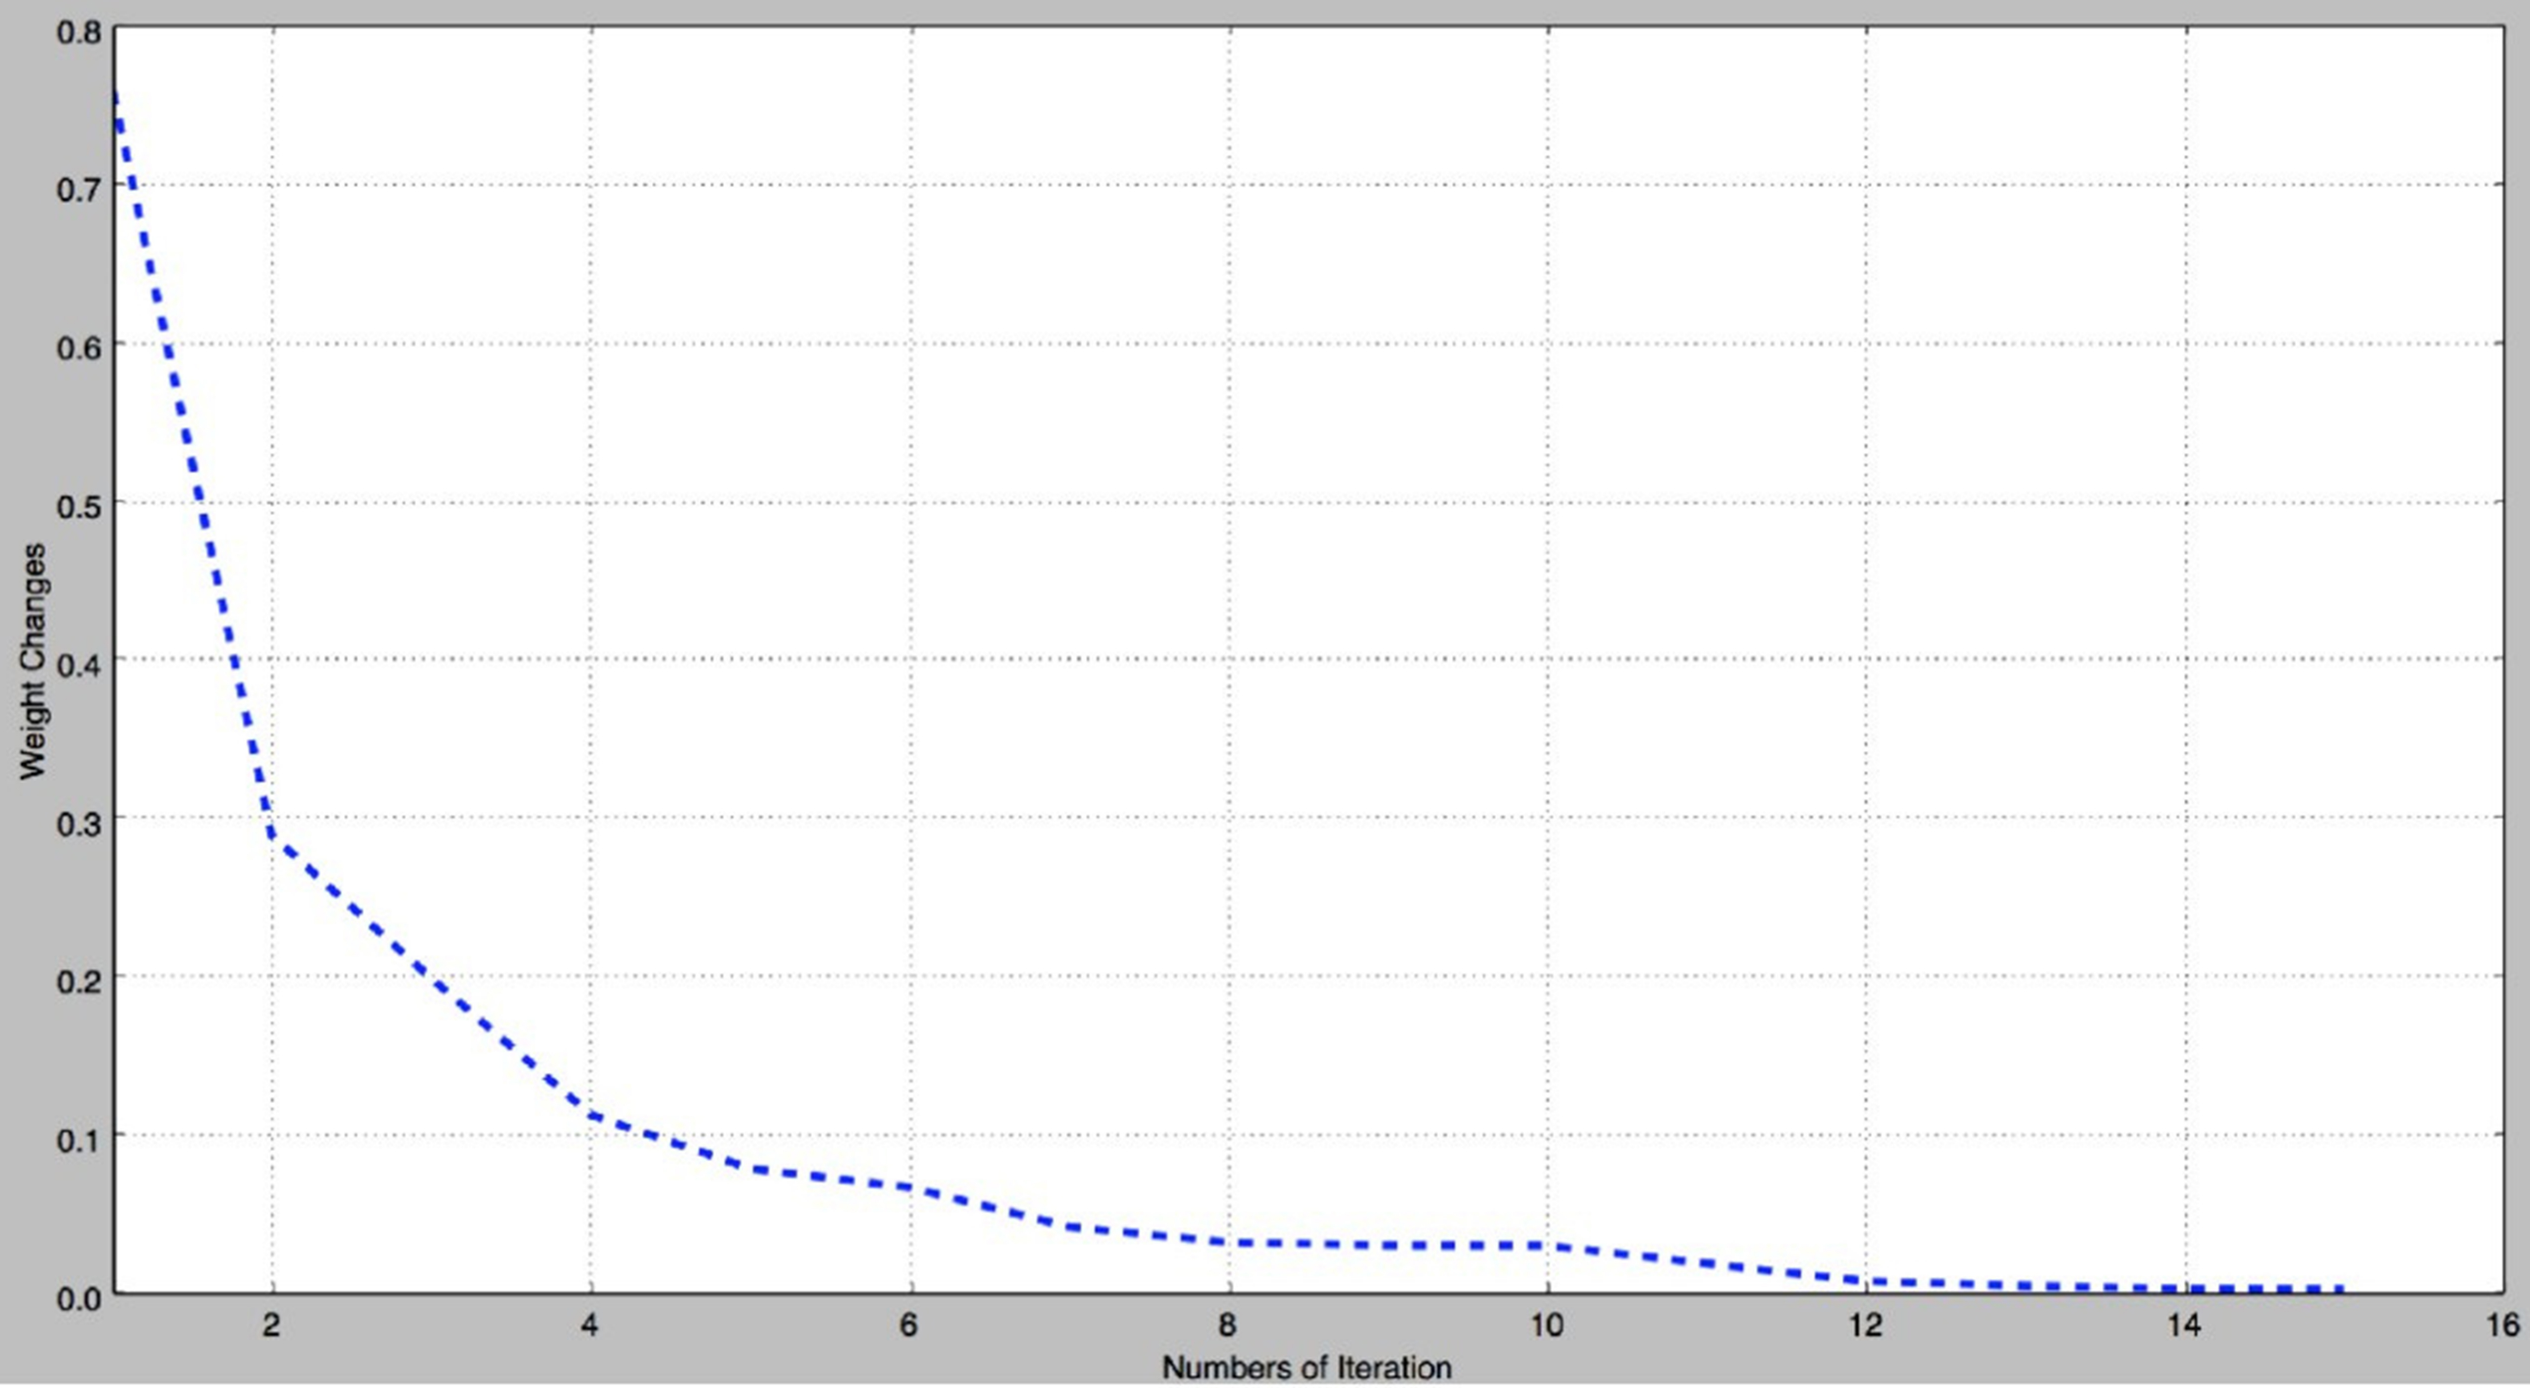

Supplement: 12918_2016_292_MOESM2_ESM.pdf [file 12918_2016_292_MOESM2_ESM.pdf]
